# Supplementary material for: Highly luminescent near-infrared Cu-doped InP quantum dots with a Zn–Cu–In–S/ZnS double shell scheme
Source: Royal Society of Chemistry journal article supplement (doi:10.1039/d0tc05907b), 2021-01-01
Supplement: d0tc05907b1.pdf [file d0tc05907b1.pdf]

## Electronic Supplementary Information (ESI)

# Highly luminescent near-infrared Cu-doped InP quantum dots with Zn–Cu–In–S/ZnS double shell scheme

Jiyong Kim,<sup>a</sup> Hyung Seok Choi,<sup>a</sup> Armin Wedel,<sup>a</sup> Suk-Young Yoon,<sup>b</sup> Jung-Ho Jo,<sup>b</sup> Hyun-Min Kim,<sup>b</sup> Chul-Jong Han,<sup>c</sup> Hong-Joo Song,<sup>c</sup> Jeong-Min Yi,<sup>c</sup> Jong-Shik Jang,<sup>d</sup> Hannes Zschiesche,<sup>e</sup> Bum-Joo Lee,<sup>\*f</sup> Kyoungwon Park<sup>\*c</sup> and Heesun Yang<sup>\*b</sup>

<sup>a</sup> Functional Materials and Devices, Fraunhofer Institute for Applied Polymer Research, Potsdam 14476, Germany

<sup>b</sup> Department of Materials Science and Engineering, Hongik University, Seoul 04066, Korea

<sup>c</sup> Display Research Center, Korea Electronics Technology Institute, Seongnam-si, Gyeonggi-do 05658, Korea

<sup>d</sup> Analytical Instrumentation Center, Industry-University Cooperation Foundation, Hanyang University, Seoul 04763, Korea

<sup>e</sup> Department of Colloid Chemistry, Max Planck Institute of Colloids and Interfaces, Potsdam 14476, Germany

<sup>f</sup> Graduate School of Flexible and Printable Electronics, Jeonbuk National University, Jeonju, Jeollabuk-do 54896, Korea

**Table S1** Absolute PL QYs of InP:Cu QDs synthesized from Cu<sup>2+</sup> and Cu<sup>+</sup> with/without DDT.

| QD     | Absolute PL QY (%)             |                  |                               |                 |
|--------|--------------------------------|------------------|-------------------------------|-----------------|
|        | Cu <sup>2+</sup><br>(with DDT) | Cu <sup>2+</sup> | Cu <sup>+</sup><br>(with DDT) | Cu <sup>+</sup> |
| InP:Cu | 26.7                           | 12.2             | 21.5                          | 9.4             |

**Table S2** Absolute PL QYs of InP, InP:Cu, InP:Cu/ZCIS, and InP:Cu/ZCIS/ZnS QDs produced from different-sized InP cores used for Cu doping.

| QD              | Absolute PL QY (%) |                 |                 |                 |
|-----------------|--------------------|-----------------|-----------------|-----------------|
|                 | 532 nm<br>(QD1)    | 567 nm<br>(QD2) | 610 nm<br>(QD3) | 632 nm<br>(QD4) |
| InP             | 7.5                | 13.2            | 12.1            | 10.5            |
| InP:Cu          | 20.5               | 26.7            | 25.5            | 24.8            |
| InP:Cu/ZCIS     | 60.8               | 64.8            | 61.5            | 60.4            |
| InP:Cu/ZCIS/ZnS | 72.7               | 82.4            | 73.3            | 71.5            |

**Table S3** ICP-OES results of QDs for each synthetic step.

| QD              | Element         |                |                 |                 |
|-----------------|-----------------|----------------|-----------------|-----------------|
|                 | In <sup>P</sup> | S <sup>P</sup> | Zn <sup>P</sup> | Cu <sup>P</sup> |
| InP:Cu          | 1.23            | 0.34           | 0.73            | 0.5             |
| InP:Cu/ZCIS     | 4.65            | 3.07           | 1.89            | 0.72            |
| InP:Cu/ZCIS/ZnS | 3.23            | 7.92           | 9.36            | 0.65            |

P = the mole ratio calculated based on phosphine atom

**Table S4** TEM-EDS-based elemental composition results on InP:Cu/ZCIS/ZnS QDs.

| QD              | Concentration (atomic %) |      |      |     |     |
|-----------------|--------------------------|------|------|-----|-----|
|                 | In                       | S    | Zn   | Cu  | P   |
| InP:Cu/ZCIS/ZnS | 12.5                     | 27.8 | 39.3 | 2.5 | 3.6 |

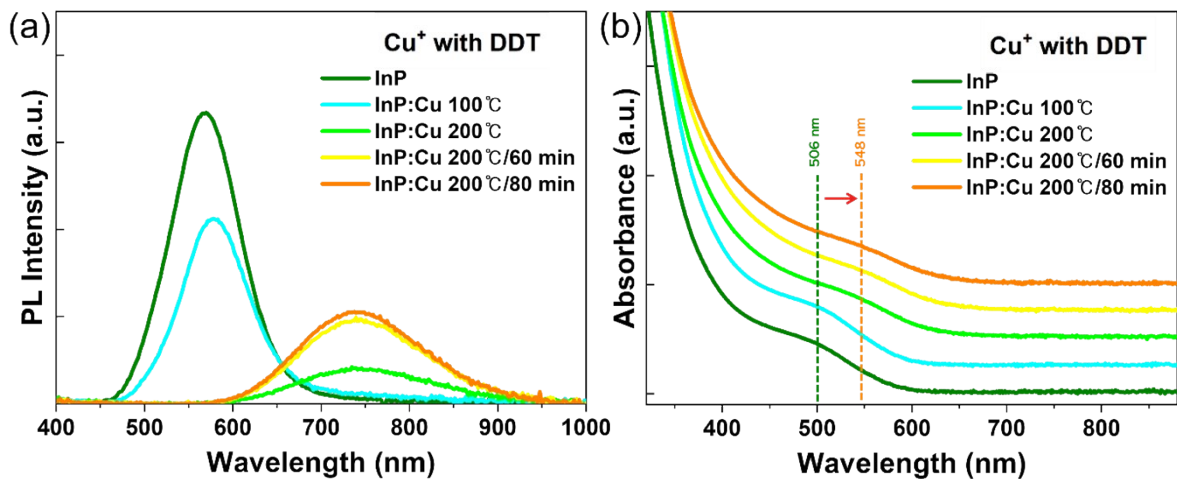

**Fig. S1** (a) PL and (b) absorption spectral evolutions with different synthetic temperatures and annealing times when Cu doping was performed by using CuCl with DDT. Vertical dotted lines in (b) show the red-shift of 1S peaks from initial InP to final InP:Cu QDs.

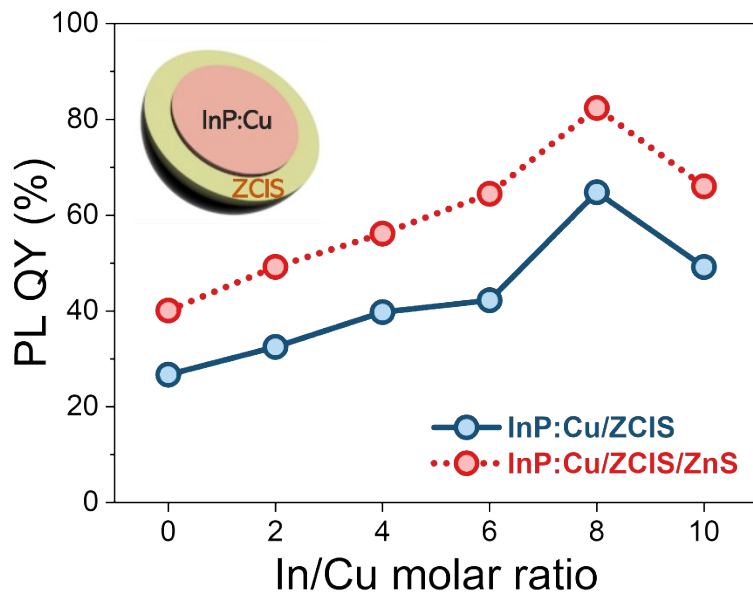

**Fig. S2** Changes of PL QY of InP:Cu/ZCIS and InP:Cu/ZCIS/ZnS QDs as a function of nominal In/Cu molar ratio used in ZCIS shelling step.

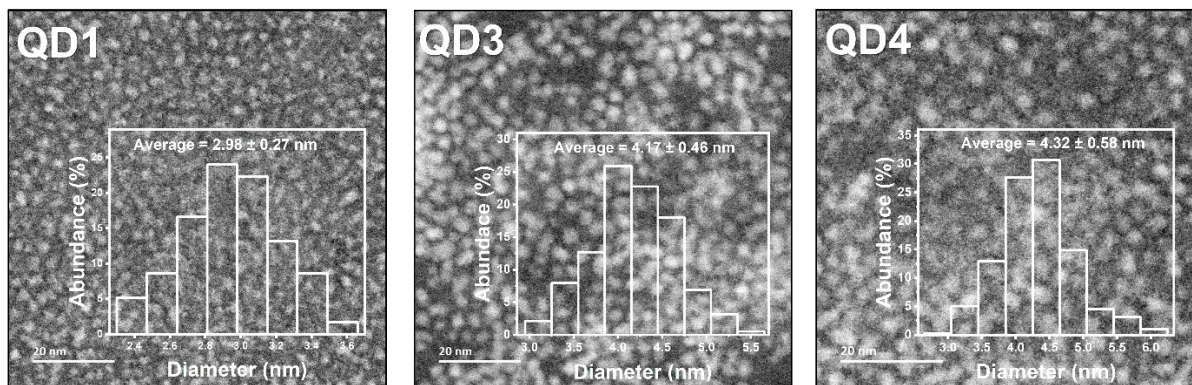

**Fig. S3** Annular dark-field scanning transmission electron microscopy (ADF-STEM) images and size histograms of QD1 (532 nm), QD3 (610 nm), and QD4 (628 nm), showing average sizes of  $2.98 \pm 0.27$ ,  $4.17 \pm 0.46$ , and  $4.32 \pm 0.58$  nm, respectively.

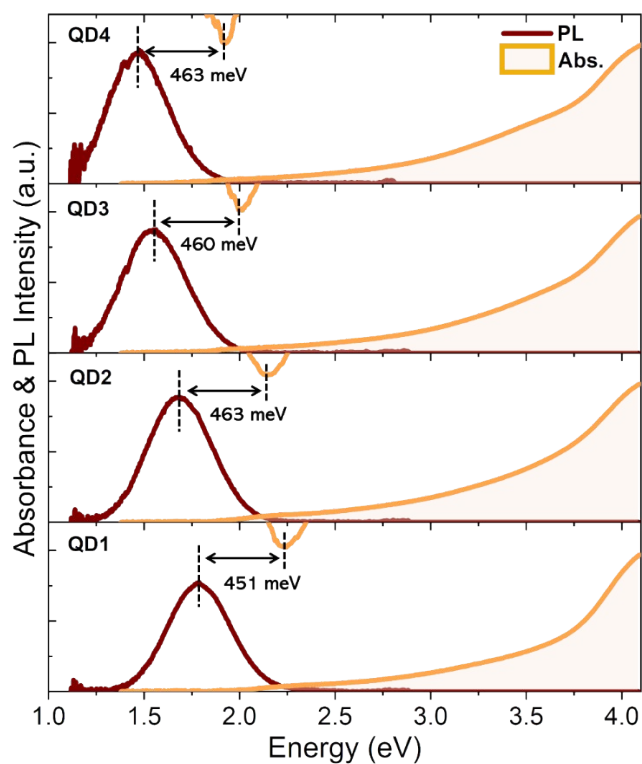

**Fig. S4** PL versus original and its second derivative absorption spectra of a series of InP:Cu/ZCIS/ZnS QDs synthesized from QD1–4, resulting in overall large Stokes shifts of 451–463 meV.

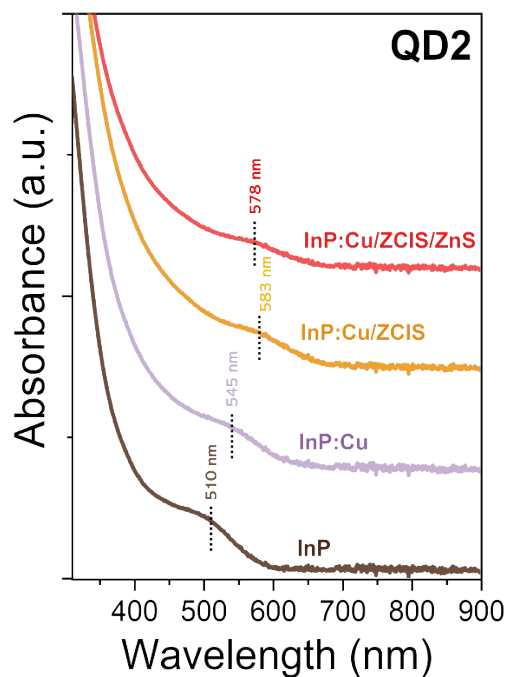

**Fig. S5** Absorption spectra of InP, InP:Cu, InP:Cu/ZCIS, and InP:Cu/ZCIS/ZnS QDs, showing a slight blue-shift from InP:Cu/ZCIS (583 nm) to InP:Cu/ZCIS/ZnS QDs (578 nm).

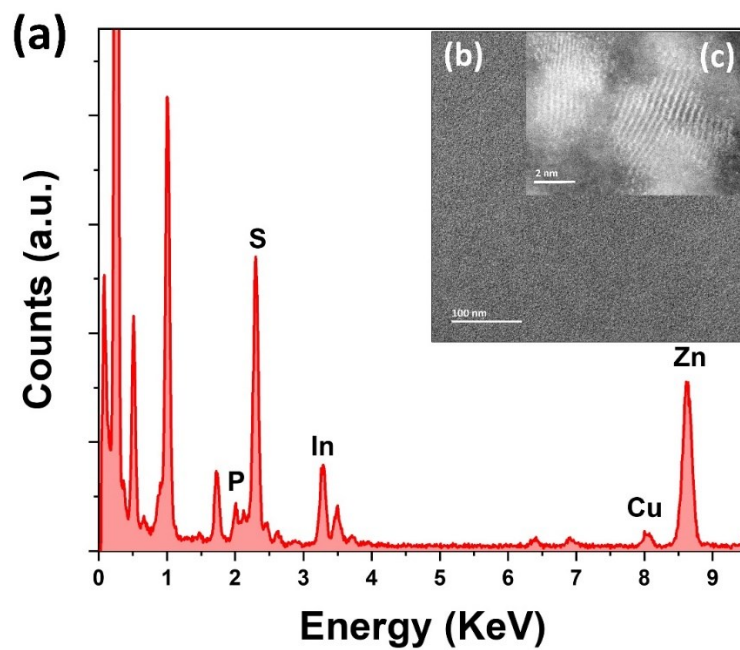

**Fig. S6** (a) EDS spectrum of InP:Cu/ZnS QDs acquired in (b) TEM image averaged over the broad area, and (c) STEM-ADF image of InP:Cu/ZnS QDs in one spot of (b).
